# Supplementary material
Source: Springer Nature journal article supplement (https://www.springermedizin.de/resource/supplementary/12906_2011_440_MOESM4_ESM.pdf/9519794)

A

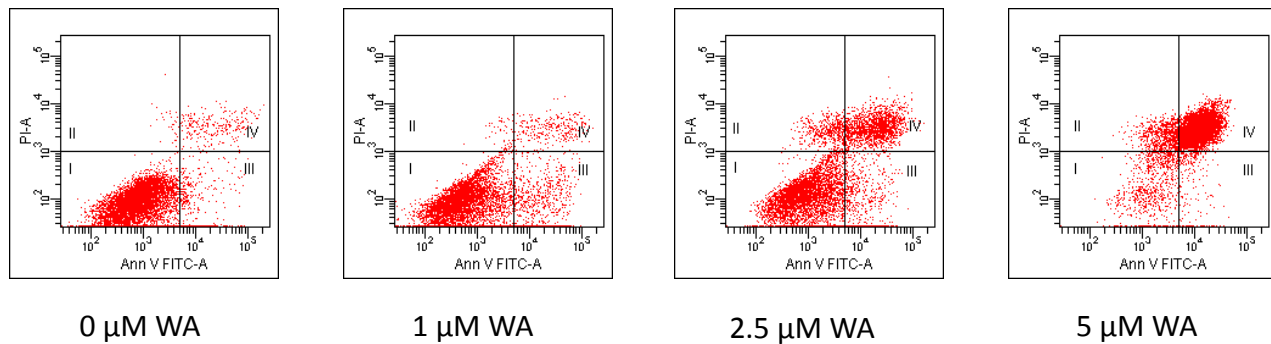

B

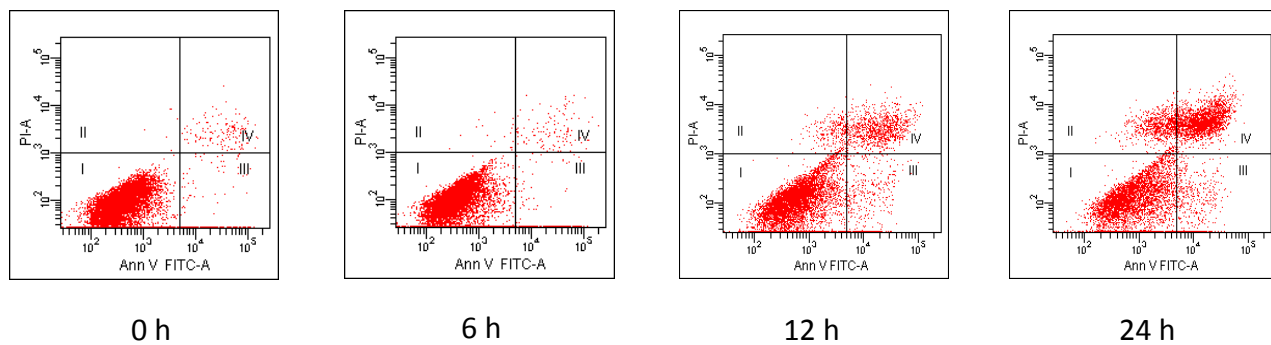

C

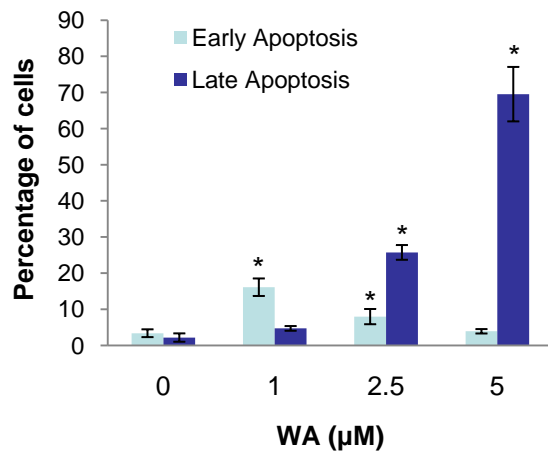

D

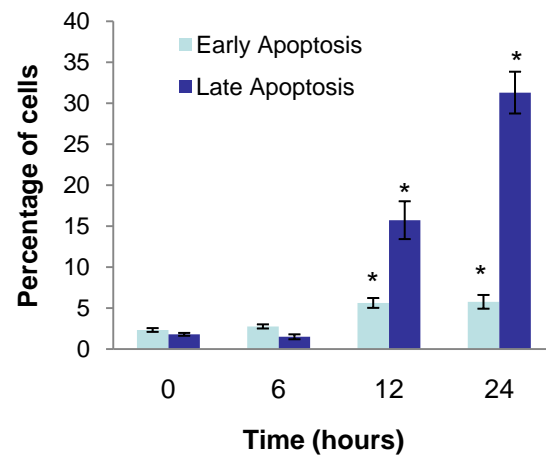

Supplement: MOESM4 [file 9519794]
